# Supplementary material for: Genetic Diversity and Population Structure of Mesoamerican Scarlet Macaws in an Ex Situ Breeding Population in Mexico
Source: MDPI journal article supplement (doi:10.3390/d14010054), 2022-01-14
Supplement: s1 [file s1]

## Supplementary information

Figure S1. Genetic clusters obtained from the STRUCTURE analysis (n=215). Each individual is represented by a single vertical line divided in K colours (left). The coloured segments the individual's estimated proportion of membership to that genetic cluster.

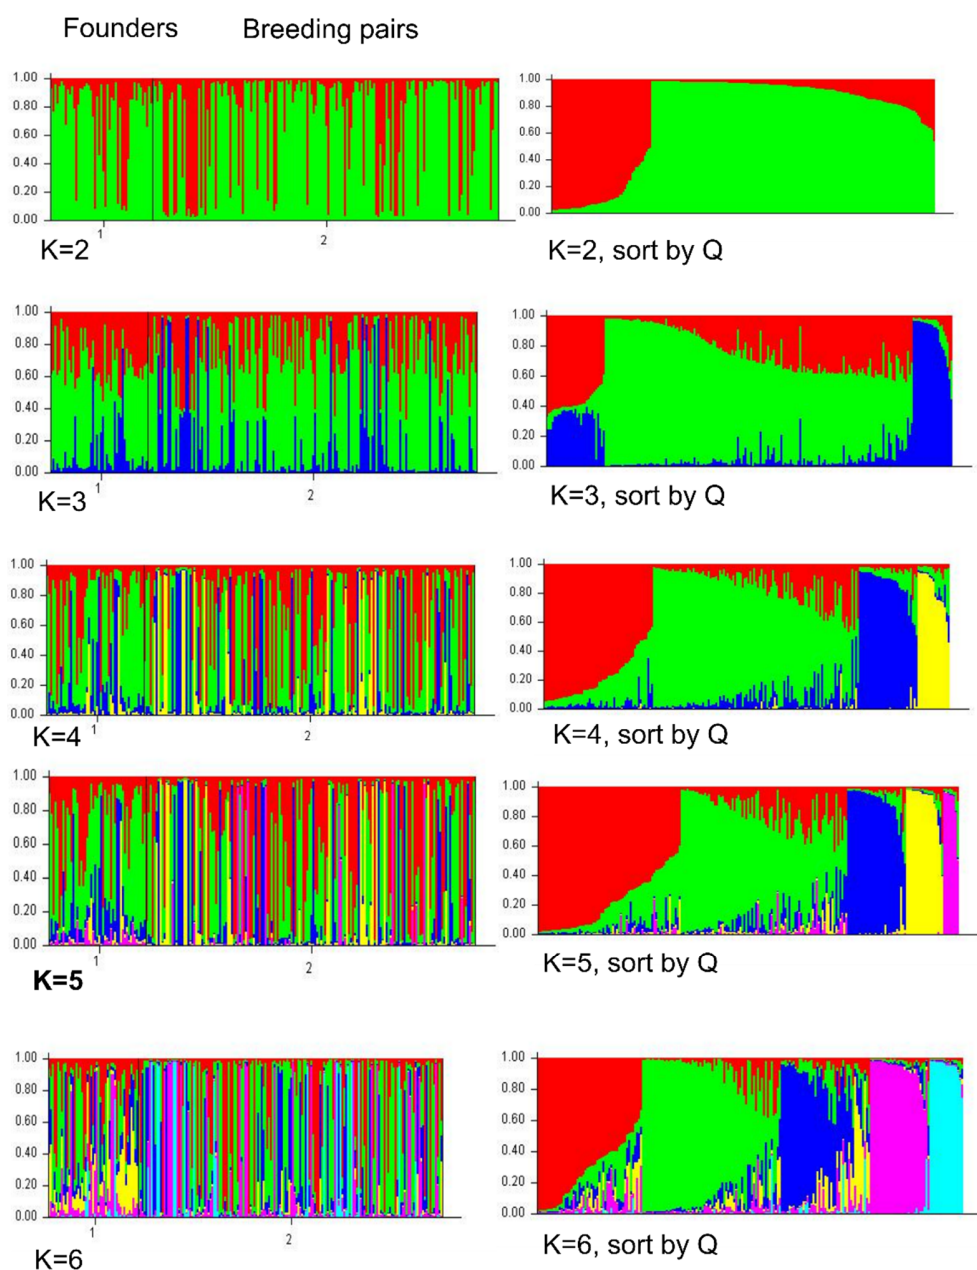

Table S1 Genotypic linkage disequilibrium, p-values for each locus pair across loci and standard error (S. E.) by population.

| Population     | Locus#1 | Locus#2 | P-Value | S.E.   | Switches | Significance |
|----------------|---------|---------|---------|--------|----------|--------------|
| Founders       | AgGT17  | AgGT19  | 0.2816  | 0.0262 | 4541     | ns           |
| Founders       | AgGT17  | AgGT21  | 1.0000  | 0.0000 | 1008     | ns           |
| Founders       | AgGT19  | AgGT21  | 0.5928  | 0.0257 | 5067     | ns           |
| Founders       | AgGT17  | AgGT42  | 0.2787  | 0.0399 | 732      | ns           |
| Founders       | AgGT19  | AgGT42  | 0.5123  | 0.0315 | 3942     | ns           |
| Founders       | AgGT21  | AgGT42  | 0.0349  | 0.0126 | 751      | ns           |
| Founders       | AgGT17  | UnaCT21 | 0.2207  | 0.0256 | 4444     | ns           |
| Founders       | AgGT19  | UnaCT21 | 0.9349  | 0.0064 | 13675    | ns           |
| Founders       | AgGT21  | UnaCT21 | 0.6345  | 0.0265 | 5040     | ns           |
| Founders       | AgGT42  | UnaCT21 | 0.1308  | 0.0227 | 3632     | ns           |
| Founders       | AgGT17  | UnaCT74 | 0.3553  | 0.0382 | 1636     | ns           |
| Founders       | AgGT19  | UnaCT74 | 0.6331  | 0.0245 | 6231     | ns           |
| Founders       | AgGT21  | UnaCT74 | 0.7646  | 0.0306 | 1951     | ns           |
| Founders       | AgGT42  | UnaCT74 | 0.0927  | 0.0234 | 1623     | ns           |
| Founders       | UnaCT21 | UnaCT74 | 0.1445  | 0.0159 | 6695     | ns           |
| Breeding pairs | AgGT17  | AgGT19  | 0.0000  | 0.0000 | 4753     | ***          |
| Breeding pairs | AgGT17  | AgGT21  | 0.0118  | 0.0072 | 1420     | *            |
| Breeding pairs | AgGT19  | AgGT21  | 0.0000  | 0.0000 | 6660     | ***          |
| Breeding pairs | AgGT17  | AgGT42  | 0.0000  | 0.0000 | 806      | ***          |
| Breeding pairs | AgGT19  | AgGT42  | 0.0032  | 0.0032 | 5638     | **           |
| Breeding pairs | AgGT21  | AgGT42  | 0.0000  | 0.0000 | 1704     | ***          |
| Breeding pairs | AgGT17  | UnaCT21 | 0.0000  | 0.0000 | 2094     | ***          |
| Breeding pairs | AgGT19  | UnaCT21 | 0.8259  | 0.0208 | 7490     | Ns           |
| Breeding pairs | AgGT21  | UnaCT21 | 0.1711  | 0.0292 | 3745     | Ns           |
| Breeding pairs | AgGT42  | UnaCT21 | 0.0000  | 0.0000 | 2469     | ***          |
| Breeding pairs | AgGT17  | UnaCT74 | 0.1743  | 0.0277 | 3202     | Ns           |
| Breeding pairs | AgGT19  | UnaCT74 | 0.1343  | 0.0167 | 9199     | Ns           |
| Breeding pairs | AgGT21  | UnaCT74 | 0.0346  | 0.0147 | 4631     | *            |
| Breeding pairs | AgGT42  | UnaCT74 | 0.0000  | 0.0000 | 3556     | ***          |
| Breeding pairs | UnaCT21 | UnaCT74 | 0.0178  | 0.0061 | 6100     | *            |

Key: ns=not significant, \* P<0.05, \*\* P<0.01, \*\*\* P<0.001

Table S2.

Summary of Chi-Square Tests for Hardy-Weinberg Equilibrium

| Population     | Locus   | df | ChiSq   | Probability | Signifance |
|----------------|---------|----|---------|-------------|------------|
| Founders       | AgGT17  | 45 | 81.952  | 0.001       | ***        |
| Founders       | AgGT19  | 6  | 4.738   | 0.578       | ns         |
| Founders       | AgGT21  | 28 | 28.186  | 0.455       | ns         |
| Founders       | AgGT42  | 66 | 66.203  | 0.470       | ns         |
| Founders       | UnaCT21 | 6  | 4.248   | 0.643       | ns         |
| Founders       | UnaCT74 | 21 | 61.828  | 0.000       | ***        |
| Breeding pairs | AgGT17  | 66 | 94.860  | 0.011       | *          |
| Breeding pairs | AgGT19  | 6  | 20.271  | 0.002       | **         |
| Breeding pairs | AgGT21  | 36 | 70.012  | 0.001       | ***        |
| Breeding pairs | AgGT42  | 91 | 146.527 | 0.000       | ***        |
| Breeding pairs | UnaCT21 | 15 | 41.998  | 0.000       | ***        |
| Breeding pairs | UnaCT74 | 10 | 13.164  | 0.215       | ns         |

Key: ns=not significant, \* P<0.05, \*\* P<0.01, \*\*\* P<0.001

Table S3. The Evanno table output of summary of simulation by Structure v. 2.3.4 from six microsatellites loci of 215 individuals of Mesoamerican scarlet macaw

| K  | Reps | Mean LnP(K) | Stdev LnP(K) | Ln'(K)   | Ln''(K) | Delta K  |
|----|------|-------------|--------------|----------|---------|----------|
| 1  | 20   | -3980.205   | 0.182        | -        | -       | -        |
| 2  | 20   | -3918.44    | 202.4474     | 61.765   | 1.73    | 0.008545 |
| 3  | 20   | -3854.945   | 288.9523     | 63.495   | 47.075  | 0.162916 |
| 4  | 20   | -3838.525   | 227.5187     | 16.42    | 126.34  | 0.555295 |
| 5  | 20   | -3695.765   | 76.6761      | 142.76   | 138.925 | 1.811841 |
| 6  | 20   | -3691.93    | 101.5262     | 3.835    | 133.595 | 1.315867 |
| 7  | 20   | -3821.69    | 161.7874     | -129.76  | 61.175  | 0.37812  |
| 8  | 20   | -4012.625   | 215.4567     | -190.935 | 9.265   | 0.043002 |
| 9  | 20   | -4194.295   | 291.9703     | -181.67  | 125.42  | 0.429564 |
| 10 | 20   | -4250.545   | 334.6388     | -56.25   | -       | -        |

Table S4. Mean and SD of the RMSD (reciprocal of the mean squared deviations of different relatedness estimators ) calculated using six loci of microsatellites for the Scarlet macaw exsitu population in Xcaret, comprising founders and breeding pairs, with KinInfor (Wang 2006).

| Locus | R_Infor  | RMSD(LL) | RMSD(QG) | RMSD(R) | RMSD(LR) | RMSD(W) |
|-------|----------|----------|----------|---------|----------|---------|
| Mean  | 0.20397  | 3.4289   | 3.2405   | 0.46119 | 3.3214   | 3.4898  |
| SD    | 0.072762 | 1.1670   | 1.4258   | 0.18017 | 1.3558   | 1.1614  |

R\_Infor denotes Informativeness for Relationship (IR)

RMSD(LL) denotes RMSD from Lynch&Li relatedness estimator

RMSD(QG) denotes RMSD from Queller&Goodnight relatedness estimator

RMSD(R) denotes RMSD from Ritland relatedness estimator

RMSD(LR) denotes RMSD from Lynch&Ritland relatedness estimator

RMSD(W) denotes RMSD from Wang relatedness estimator

Table S5. Summary statistics for relatedness point estimates calculated in the Coancestry program for six loci of microsatellites of the Scarlet macaw on the ex situ population of Xcaret.

| n=23005  | TrioML  | Wang    | LynchLi | LynchRd | Ritland  | QuellerGt | DyadML  |
|----------|---------|---------|---------|---------|----------|-----------|---------|
| Mean     | 0.12385 | 0.02139 | 0.01785 | -0.0048 | -0.00472 | -0.00292  | 0.14486 |
| Variance | 0.02621 | 0.07141 | 0.07615 | 0.03734 | 0.02913  | 0.03293   | 0.03293 |

Table S6. Ritland's relatedness estimator calculated in GenAlex, for the founders and the breeding population of Xcarlet of the scarlet macaw.

Ritland (1996)

|   |      |       |
|---|------|-------|
| n | 1176 | 13695 |
|---|------|-------|

| <b>Pop</b>                          | <b>Founders</b> | <b>Breeding pairs</b> |
|-------------------------------------|-----------------|-----------------------|
| <b>Mean</b>                         | -0.004          | -0.002                |
| <b>U</b>                            | 0.002           | -0.002                |
| <b>L</b>                            | -0.006          | -0.003                |
| <b>P(mean-rand &gt;= mean-data)</b> | 0.739           | 0.079                 |
| <b>P(mean-rand &lt;= mean-data)</b> | 0.261           | 0.921                 |

Table S7. Table of alleles of founders and breeding pairs in ex situ population of Xcaret scarlet macaws.

|          |     |     |     |     |     |     |     |     |     |     |     |     |
|----------|-----|-----|-----|-----|-----|-----|-----|-----|-----|-----|-----|-----|
| F_Am003  | 115 | 119 | 181 | 185 | 169 | 185 | 253 | 259 | 166 | 166 | 162 | 166 |
| F_Am004  | 123 | 125 | 185 | 187 | 177 | 185 | 0   | 0   | 166 | 166 | 152 | 152 |
| F_Am013  | 119 | 123 | 187 | 187 | 179 | 189 | 265 | 271 | 168 | 168 | 164 | 168 |
| F_Am034  | 129 | 131 | 185 | 187 | 179 | 189 | 253 | 265 | 168 | 168 | 162 | 164 |
| F_Am043  | 123 | 129 | 185 | 185 | 185 | 185 | 257 | 265 | 168 | 172 | 162 | 164 |
| F_Am074  | 119 | 125 | 187 | 187 | 185 | 185 | 271 | 271 | 168 | 168 | 168 | 168 |
| F_Am104  | 123 | 129 | 187 | 187 | 177 | 185 | 265 | 271 | 168 | 172 | 162 | 168 |
| F_Am105  | 127 | 129 | 187 | 187 | 185 | 187 | 251 | 257 | 166 | 166 | 164 | 164 |
| F_Am113  | 123 | 133 | 187 | 189 | 177 | 189 | 251 | 259 | 166 | 168 | 168 | 168 |
| F_Am117  | 123 | 123 | 185 | 187 | 177 | 179 | 251 | 253 | 172 | 172 | 166 | 168 |
| F_Am119  | 119 | 131 | 187 | 187 | 177 | 185 | 257 | 265 | 166 | 170 | 162 | 164 |
| F_Am126  | 129 | 133 | 185 | 187 | 185 | 189 | 251 | 265 | 166 | 168 | 164 | 164 |
| F_Am132  | 129 | 137 | 185 | 187 | 177 | 187 | 0   | 0   | 168 | 168 | 164 | 164 |
| F_Am133  | 115 | 129 | 187 | 187 | 179 | 179 | 253 | 265 | 168 | 172 | 164 | 166 |
| F_Am136  | 125 | 129 | 185 | 187 | 179 | 181 | 257 | 265 | 166 | 168 | 164 | 164 |
| F_Am138  | 119 | 127 | 185 | 187 | 179 | 183 | 251 | 271 | 166 | 168 | 164 | 168 |
| F_Am140  | 123 | 127 | 187 | 187 | 177 | 179 | 257 | 259 | 166 | 172 | 164 | 168 |
| F_Am142a | 125 | 133 | 185 | 187 | 179 | 185 | 253 | 259 | 168 | 170 | 164 | 168 |
| F_Am145  | 119 | 129 | 185 | 187 | 185 | 185 | 251 | 257 | 166 | 166 | 164 | 168 |
| F_Am148  | 123 | 129 | 185 | 185 | 185 | 189 | 261 | 265 | 166 | 168 | 164 | 164 |
| F_Am149  | 129 | 131 | 185 | 185 | 185 | 187 | 255 | 259 | 166 | 172 | 164 | 168 |
| F_Am152  | 129 | 131 | 185 | 185 | 177 | 187 | 251 | 267 | 168 | 170 | 150 | 162 |
| F_Am156  | 129 | 131 | 187 | 187 | 177 | 179 | 257 | 265 | 166 | 168 | 164 | 164 |
| F_Am159  | 129 | 137 | 185 | 185 | 169 | 177 | 251 | 265 | 168 | 168 | 164 | 168 |
| F_Am162  | 119 | 123 | 187 | 187 | 179 | 181 | 245 | 265 | 168 | 170 | 162 | 164 |
| F_Am165  | 129 | 137 | 185 | 187 | 187 | 187 | 251 | 253 | 168 | 172 | 164 | 166 |
| F_Am166  | 127 | 129 | 187 | 187 | 189 | 189 | 265 | 267 | 172 | 172 | 152 | 164 |
| F_Am168  | 121 | 121 | 187 | 187 | 185 | 189 | 0   | 0   | 168 | 168 | 164 | 168 |
| F_Am170  | 129 | 129 | 185 | 185 | 177 | 187 | 253 | 265 | 168 | 168 | 164 | 166 |
| F_Am181  | 127 | 129 | 185 | 187 | 181 | 189 | 259 | 265 | 168 | 168 | 162 | 164 |
| F_Am182  | 127 | 129 | 187 | 187 | 177 | 179 | 257 | 265 | 168 | 172 | 164 | 166 |
| F_Am183  | 129 | 133 | 185 | 185 | 185 | 185 | 259 | 261 | 166 | 168 | 164 | 168 |
| F_Am195  | 125 | 127 | 187 | 187 | 177 | 177 | 251 | 267 | 166 | 170 | 150 | 160 |
| F_Am211  | 115 | 119 | 185 | 187 | 185 | 189 | 251 | 253 | 168 | 168 | 164 | 164 |
| F_Am2536 | 127 | 129 | 185 | 187 | 177 | 187 | 251 | 267 | 166 | 168 | 152 | 164 |
| F_Am2572 | 127 | 129 | 185 | 187 | 177 | 189 | 265 | 267 | 166 | 168 | 152 | 164 |
| F_Am327  | 115 | 129 | 185 | 185 | 187 | 187 | 251 | 251 | 166 | 168 | 164 | 164 |
| F_Am528  | 129 | 129 | 185 | 185 | 187 | 187 | 261 | 265 | 166 | 168 | 162 | 162 |
| F_Am535  | 119 | 127 | 185 | 185 | 185 | 185 | 251 | 265 | 166 | 168 | 164 | 164 |
| F_Am776  | 127 | 129 | 185 | 185 | 185 | 185 | 251 | 253 | 166 | 166 | 162 | 164 |
| F_AmMA01 | 119 | 119 | 181 | 187 | 185 | 185 | 259 | 261 | 172 | 172 | 164 | 164 |
| F_AmMA02 | 119 | 119 | 181 | 187 | 177 | 187 | 251 | 261 | 166 | 172 | 164 | 164 |
| F_AmMA03 | 119 | 129 | 185 | 187 | 181 | 185 | 253 | 257 | 166 | 172 | 162 | 164 |
| F_AmMA04 | 125 | 129 | 185 | 185 | 179 | 185 | 243 | 261 | 166 | 170 | 162 | 166 |
| F_AmMA05 | 129 | 131 | 181 | 185 | 169 | 187 | 253 | 265 | 166 | 168 | 162 | 164 |
| F_AmMA06 | 119 | 125 | 181 | 187 | 169 | 185 | 251 | 263 | 166 | 172 | 164 | 164 |
| F_AmMA07 | 115 | 129 | 181 | 181 | 177 | 189 | 257 | 267 | 166 | 172 | 164 | 166 |
| F_AmMA08 | 119 | 127 | 181 | 187 | 177 | 185 | 257 | 265 | 166 | 168 | 164 | 164 |
| F_AmMA09 | 127 | 129 | 181 | 185 | 179 | 185 | 251 | 253 | 168 | 168 | 164 | 164 |
| B_PR001  | 123 | 131 | 185 | 187 | 177 | 185 | 259 | 265 | 166 | 166 | 164 | 168 |
| B_PR002  | 129 | 129 | 187 | 187 | 179 | 191 | 257 | 265 | 168 | 172 | 162 | 164 |
| B_PR003  | 123 | 129 | 185 | 187 | 179 | 187 | 253 | 265 | 168 | 172 | 164 | 166 |
| B_PR004  | 121 | 123 | 187 | 187 | 177 | 179 | 265 | 271 | 168 | 172 | 164 | 168 |
| B_PR005  | 123 | 123 | 181 | 187 | 177 | 179 | 253 | 259 | 168 | 168 | 164 | 166 |
| B_PR006  | 115 | 129 | 185 | 185 | 177 | 187 | 251 | 265 | 172 | 172 | 164 | 168 |
| B_PR007  | 129 | 137 | 185 | 187 | 177 | 189 | 265 | 267 | 166 | 168 | 152 | 164 |
| B_PR008  | 129 | 131 | 185 | 185 | 177 | 187 | 251 | 255 | 150 | 170 | 164 | 164 |
| B_PR009  | 115 | 123 | 185 | 187 | 0   | 0   | 253 | 265 | 168 | 172 | 164 | 166 |

|         |     |     |     |     |     |     |     |     |     |     |     |     |
|---------|-----|-----|-----|-----|-----|-----|-----|-----|-----|-----|-----|-----|
| B_PR010 | 123 | 129 | 185 | 187 | 0   | 0   | 251 | 259 | 168 | 172 | 164 | 168 |
| B_PR011 | 115 | 125 | 185 | 187 | 0   | 0   | 251 | 251 | 150 | 168 | 162 | 164 |
| B_PR012 | 115 | 129 | 185 | 185 | 0   | 0   | 251 | 255 | 168 | 172 | 0   | 0   |
| B_PR013 | 123 | 125 | 185 | 187 | 0   | 0   | 253 | 259 | 172 | 174 | 0   | 0   |
| B_PR014 | 129 | 131 | 185 | 187 | 0   | 0   | 257 | 257 | 168 | 170 | 164 | 166 |
| B_PR015 | 127 | 129 | 187 | 187 | 0   | 0   | 251 | 265 | 166 | 168 | 0   | 0   |
| B_PR016 | 115 | 123 | 185 | 187 | 0   | 0   | 253 | 265 | 168 | 172 | 164 | 166 |
| B_PR017 | 127 | 129 | 185 | 187 | 177 | 187 | 265 | 267 | 166 | 168 | 152 | 164 |
| B_PR018 | 129 | 137 | 185 | 187 | 177 | 189 | 265 | 265 | 168 | 172 | 164 | 164 |
| B_PR019 | 127 | 129 | 185 | 187 | 177 | 189 | 251 | 267 | 168 | 172 | 152 | 164 |
| B_PR020 | 125 | 131 | 185 | 185 | 177 | 187 | 251 | 251 | 170 | 172 | 162 | 164 |
| B_PR021 | 115 | 125 | 185 | 185 | 177 | 187 | 251 | 251 | 170 | 172 | 162 | 164 |
| B_PR022 | 129 | 137 | 187 | 187 | 179 | 187 | 251 | 267 | 168 | 172 | 152 | 164 |
| B_PR023 | 129 | 131 | 185 | 187 | 177 | 185 | 257 | 265 | 170 | 172 | 162 | 166 |
| B_PR024 | 127 | 129 | 187 | 187 | 179 | 187 | 251 | 265 | 168 | 172 | 164 | 164 |
| B_PR025 | 129 | 133 | 185 | 187 | 181 | 185 | 259 | 261 | 166 | 168 | 164 | 168 |
| B_PR026 | 125 | 131 | 185 | 185 | 177 | 187 | 251 | 255 | 168 | 172 | 164 | 164 |
| B_PR027 | 125 | 129 | 181 | 185 | 177 | 187 | 251 | 253 | 168 | 172 | 166 | 168 |
| B_PR028 | 129 | 133 | 185 | 187 | 177 | 187 | 251 | 265 | 166 | 168 | 164 | 164 |
| B_PR029 | 129 | 133 | 187 | 187 | 179 | 189 | 259 | 265 | 168 | 168 | 164 | 168 |
| B_PR030 | 123 | 129 | 185 | 187 | 179 | 185 | 253 | 261 | 170 | 172 | 162 | 164 |
| B_PR031 | 129 | 131 | 185 | 187 | 177 | 185 | 251 | 255 | 150 | 170 | 164 | 164 |
| B_PR032 | 125 | 129 | 185 | 187 | 177 | 185 | 259 | 271 | 166 | 168 | 168 | 168 |
| B_PR033 | 123 | 127 | 185 | 185 | 185 | 189 | 257 | 265 | 166 | 166 | 164 | 166 |
| B_PR034 | 123 | 127 | 185 | 187 | 177 | 185 | 251 | 275 | 168 | 168 | 0   | 0   |
| B_PR035 | 129 | 131 | 185 | 187 | 177 | 185 | 257 | 259 | 166 | 170 | 0   | 0   |
| B_PR036 | 125 | 133 | 187 | 187 | 177 | 191 | 257 | 271 | 168 | 172 | 0   | 0   |
| B_PR037 | 129 | 129 | 181 | 185 | 0   | 0   | 259 | 265 | 168 | 172 | 0   | 0   |
| B_PR038 | 129 | 129 | 185 | 187 | 177 | 187 | 265 | 265 | 166 | 168 | 0   | 0   |
| B_PR039 | 123 | 125 | 185 | 187 | 185 | 189 | 253 | 265 | 168 | 170 | 0   | 0   |
| B_PR040 | 123 | 137 | 185 | 185 | 185 | 189 | 257 | 265 | 166 | 168 | 0   | 0   |
| B_PR041 | 129 | 137 | 185 | 187 | 179 | 185 | 257 | 265 | 168 | 172 | 162 | 164 |
| B_PR042 | 119 | 123 | 185 | 185 | 177 | 187 | 251 | 251 | 150 | 170 | 162 | 164 |
| B_PR043 | 123 | 133 | 185 | 187 | 177 | 185 | 251 | 251 | 170 | 172 | 162 | 164 |
| B_PR044 | 129 | 129 | 185 | 187 | 177 | 187 | 251 | 265 | 168 | 172 | 164 | 164 |
| B_PR045 | 123 | 125 | 187 | 187 | 185 | 185 | 253 | 271 | 168 | 168 | 164 | 168 |
| B_PR046 | 123 | 131 | 187 | 187 | 185 | 189 | 251 | 271 | 168 | 168 | 164 | 168 |
| B_PR047 | 129 | 129 | 185 | 185 | 185 | 185 | 257 | 261 | 166 | 168 | 0   | 0   |
| B_PR048 | 123 | 129 | 185 | 187 | 177 | 189 | 255 | 265 | 166 | 168 | 164 | 166 |
| B_PR049 | 129 | 129 | 185 | 187 | 181 | 185 | 257 | 261 | 168 | 168 | 164 | 164 |
| B_PR050 | 119 | 133 | 185 | 187 | 185 | 185 | 259 | 265 | 166 | 168 | 164 | 164 |
| B_PR051 | 0   | 0   | 185 | 187 | 177 | 189 | 255 | 265 | 166 | 168 | 164 | 164 |
| B_PR052 | 129 | 131 | 185 | 187 | 181 | 185 | 257 | 261 | 166 | 166 | 164 | 164 |
| B_PR053 | 123 | 129 | 187 | 187 | 177 | 179 | 259 | 271 | 166 | 168 | 164 | 168 |
| B_PR054 | 119 | 119 | 185 | 187 | 185 | 185 | 259 | 265 | 168 | 168 | 164 | 164 |
| B_PR055 | 123 | 129 | 187 | 187 | 177 | 185 | 255 | 265 | 168 | 168 | 162 | 164 |
| B_PR056 | 127 | 129 | 185 | 187 | 177 | 189 | 265 | 267 | 166 | 168 | 164 | 168 |
| B_PR057 | 129 | 129 | 187 | 187 | 177 | 179 | 265 | 271 | 166 | 168 | 164 | 164 |
| B_PR058 | 123 | 133 | 185 | 187 | 185 | 185 | 265 | 271 | 166 | 168 | 164 | 168 |
| B_PR059 | 127 | 137 | 187 | 187 | 187 | 189 | 265 | 267 | 168 | 168 | 164 | 168 |
| B_PR060 | 129 | 129 | 185 | 187 | 177 | 179 | 251 | 265 | 166 | 172 | 152 | 164 |
| B_PR061 | 129 | 129 | 185 | 185 | 185 | 185 | 257 | 261 | 166 | 166 | 164 | 166 |
| B_PR062 | 119 | 119 | 187 | 187 | 185 | 189 | 265 | 271 | 166 | 166 | 152 | 162 |
| B_PR063 | 123 | 133 | 185 | 187 | 179 | 185 | 265 | 271 | 168 | 168 | 164 | 164 |
| B_PR064 | 129 | 131 | 187 | 187 | 185 | 189 | 255 | 265 | 166 | 168 | 164 | 164 |
| B_PR065 | 121 | 133 | 185 | 187 | 177 | 185 | 265 | 271 | 166 | 168 | 164 | 168 |
| B_PR066 | 119 | 125 | 185 | 187 | 177 | 177 | 243 | 253 | 166 | 166 | 164 | 168 |
| B_PR067 | 119 | 123 | 185 | 185 | 177 | 185 | 259 | 271 | 166 | 168 | 164 | 168 |
| B_PR068 | 123 | 137 | 185 | 185 | 169 | 177 | 253 | 265 | 168 | 168 | 164 | 166 |
| B_PR069 | 119 | 119 | 187 | 187 | 177 | 187 | 253 | 265 | 166 | 172 | 162 | 164 |
| B_PR070 | 123 | 127 | 185 | 187 | 179 | 185 | 265 | 271 | 168 | 172 | 164 | 164 |



|         |     |     |     |     |     |     |     |     |     |     |     |     |
|---------|-----|-----|-----|-----|-----|-----|-----|-----|-----|-----|-----|-----|
| B_PR071 | 123 | 131 | 187 | 187 | 181 | 181 | 253 | 265 | 166 | 168 | 168 | 168 |
| B_PR072 | 123 | 129 | 185 | 187 | 177 | 189 | 259 | 265 | 166 | 168 | 162 | 164 |
| B_PR073 | 119 | 129 | 187 | 187 | 177 | 185 | 257 | 265 | 166 | 166 | 164 | 164 |
| B_PR074 | 119 | 123 | 185 | 187 | 179 | 185 | 251 | 271 | 166 | 168 | 162 | 164 |
| B_PR075 | 129 | 137 | 185 | 187 | 177 | 187 | 251 | 265 | 166 | 168 | 164 | 168 |
| B_PR076 | 123 | 131 | 181 | 185 | 177 | 185 | 259 | 271 | 166 | 168 | 164 | 168 |
| B_PR077 | 123 | 129 | 185 | 187 | 169 | 169 | 253 | 269 | 166 | 168 | 164 | 164 |
| B_PR078 | 115 | 123 | 185 | 187 | 177 | 179 | 251 | 259 | 168 | 172 | 162 | 164 |
| B_PR079 | 129 | 131 | 181 | 189 | 169 | 177 | 251 | 253 | 166 | 168 | 152 | 162 |
| B_PR080 | 119 | 133 | 187 | 187 | 0   | 0   | 259 | 265 | 168 | 168 | 164 | 168 |
| B_PR081 | 123 | 133 | 181 | 187 | 177 | 177 | 253 | 265 | 166 | 168 | 164 | 164 |
| B_PR082 | 127 | 133 | 185 | 187 | 179 | 185 | 251 | 253 | 168 | 174 | 164 | 168 |
| B_PR083 | 115 | 119 | 185 | 187 | 177 | 185 | 243 | 253 | 166 | 172 | 164 | 168 |
| B_PR084 | 123 | 127 | 185 | 187 | 177 | 187 | 265 | 269 | 166 | 168 | 164 | 164 |
| B_PR085 | 127 | 129 | 187 | 187 | 177 | 187 | 251 | 267 | 166 | 168 | 164 | 164 |
| B_PR086 | 129 | 133 | 185 | 187 | 177 | 189 | 257 | 259 | 166 | 168 | 152 | 164 |
| B_PR087 | 129 | 131 | 185 | 187 | 179 | 187 | 257 | 271 | 168 | 168 | 164 | 168 |
| B_PR088 | 133 | 135 | 187 | 187 | 185 | 189 | 251 | 275 | 168 | 174 | 162 | 168 |
| B_PR089 | 123 | 129 | 181 | 185 | 177 | 177 | 251 | 259 | 168 | 168 | 152 | 164 |
| B_PR090 | 121 | 123 | 185 | 187 | 179 | 185 | 257 | 265 | 168 | 172 | 164 | 166 |
| B_PR091 | 133 | 133 | 185 | 187 | 177 | 185 | 251 | 253 | 168 | 168 | 164 | 168 |
| B_PR092 | 115 | 123 | 181 | 185 | 177 | 187 | 251 | 259 | 168 | 172 | 168 | 168 |
| B_PR093 | 125 | 131 | 185 | 185 | 177 | 187 | 251 | 255 | 150 | 166 | 164 | 164 |
| B_PR094 | 131 | 131 | 187 | 189 | 177 | 189 | 253 | 265 | 166 | 168 | 164 | 166 |
| B_PR095 | 129 | 137 | 187 | 187 | 179 | 187 | 265 | 265 | 166 | 168 | 164 | 168 |
| B_PR096 | 125 | 129 | 185 | 187 | 185 | 189 | 265 | 265 | 168 | 168 | 164 | 164 |
| B_PR097 | 123 | 131 | 187 | 187 | 177 | 189 | 255 | 259 | 166 | 168 | 164 | 166 |
| B_PR098 | 129 | 131 | 185 | 187 | 181 | 185 | 253 | 261 | 166 | 168 | 164 | 164 |
| B_PR099 | 129 | 131 | 185 | 187 | 181 | 185 | 257 | 265 | 166 | 168 | 162 | 164 |
| B_PR100 | 0   | 0   | 185 | 187 | 177 | 179 | 243 | 253 | 166 | 166 | 152 | 162 |
| B_PR101 | 0   | 0   | 185 | 185 | 185 | 185 | 253 | 265 | 166 | 168 | 162 | 164 |
| B_PR102 | 0   | 0   | 185 | 187 | 177 | 185 | 251 | 251 | 170 | 172 | 162 | 164 |
| B_PR103 | 121 | 123 | 187 | 187 | 177 | 185 | 257 | 259 | 166 | 168 | 162 | 168 |
| B_PR104 | 123 | 129 | 181 | 185 | 177 | 177 | 259 | 265 | 168 | 172 | 164 | 164 |
| B_PR105 | 119 | 133 | 185 | 187 | 179 | 185 | 265 | 271 | 166 | 168 | 164 | 168 |
| B_PR106 | 123 | 133 | 185 | 185 | 183 | 185 | 251 | 251 | 168 | 168 | 164 | 168 |
| B_PR107 | 123 | 129 | 185 | 187 | 185 | 187 | 257 | 259 | 166 | 168 | 162 | 168 |
| B_PR108 | 129 | 137 | 185 | 187 | 177 | 189 | 265 | 267 | 166 | 168 | 152 | 164 |
| B_PR109 | 115 | 129 | 185 | 185 | 177 | 187 | 251 | 255 | 150 | 168 | 164 | 164 |
| B_PR110 | 115 | 123 | 185 | 187 | 179 | 187 | 0   | 0   | 168 | 168 | 164 | 164 |
| B_PR111 | 115 | 129 | 185 | 187 | 177 | 185 | 251 | 255 | 150 | 168 | 164 | 164 |
| B_PR112 | 127 | 131 | 185 | 187 | 185 | 187 | 265 | 265 | 168 | 170 | 162 | 164 |
| B_PR113 | 123 | 129 | 187 | 187 | 179 | 181 | 253 | 259 | 168 | 168 | 152 | 164 |
| B_PR114 | 115 | 123 | 185 | 187 | 179 | 187 | 251 | 259 | 168 | 172 | 164 | 168 |
| B_PR115 | 115 | 129 | 185 | 187 | 177 | 185 | 251 | 251 | 150 | 168 | 162 | 164 |
| B_PR116 | 129 | 133 | 187 | 187 | 179 | 185 | 265 | 271 | 166 | 168 | 164 | 168 |
| B_PR117 | 115 | 125 | 185 | 185 | 177 | 187 | 251 | 255 | 168 | 168 | 164 | 164 |
| B_PR118 | 129 | 137 | 185 | 187 | 177 | 189 | 251 | 267 | 166 | 168 | 152 | 164 |
| B_PR119 | 129 | 131 | 187 | 187 | 179 | 187 | 259 | 267 | 166 | 168 | 162 | 162 |
| B_PR120 | 123 | 125 | 185 | 187 | 0   | 0   | 255 | 265 | 166 | 168 | 164 | 166 |
| B_PR121 | 115 | 125 | 185 | 185 | 177 | 187 | 251 | 251 | 168 | 168 | 162 | 164 |
| B_PR122 | 129 | 129 | 187 | 187 | 179 | 187 | 257 | 265 | 166 | 166 | 162 | 162 |
| B_PR123 | 123 | 125 | 187 | 187 | 179 | 179 | 253 | 259 | 168 | 168 | 164 | 168 |
| B_PR124 | 0   | 0   | 185 | 187 | 177 | 185 | 261 | 265 | 168 | 168 | 164 | 164 |
| B_PR125 | 129 | 131 | 185 | 187 | 181 | 185 | 257 | 261 | 168 | 168 | 164 | 164 |
| B_PR126 | 129 | 133 | 185 | 187 | 179 | 185 | 259 | 271 | 168 | 172 | 168 | 168 |
| B_PR127 | 123 | 129 | 185 | 187 | 169 | 177 | 265 | 269 | 166 | 168 | 164 | 166 |
| B_PR128 | 127 | 129 | 185 | 187 | 177 | 187 | 265 | 265 | 166 | 168 | 164 | 164 |
| B_PR129 | 123 | 125 | 185 | 187 | 185 | 185 | 253 | 261 | 168 | 170 | 162 | 164 |
| B_PR130 | 119 | 133 | 187 | 187 | 179 | 189 | 265 | 271 | 168 | 168 | 164 | 168 |
| B_PR131 | 127 | 129 | 187 | 187 | 179 | 189 | 265 | 265 | 168 | 172 | 164 | 164 |

|         |     |     |     |     |     |     |     |     |     |     |     |     |
|---------|-----|-----|-----|-----|-----|-----|-----|-----|-----|-----|-----|-----|
| B_PR132 | 127 | 129 | 185 | 187 | 169 | 185 | 253 | 253 | 170 | 174 | 164 | 164 |
| B_PR133 | 119 | 127 | 181 | 185 | 177 | 185 | 259 | 271 | 166 | 168 | 164 | 164 |
| B_PR134 | 129 | 133 | 185 | 187 | 177 | 185 | 265 | 271 | 166 | 168 | 164 | 168 |
| B_PR135 | 125 | 131 | 187 | 187 | 177 | 181 | 255 | 261 | 166 | 166 | 164 | 166 |
| B_PR136 | 119 | 123 | 185 | 187 | 185 | 185 | 265 | 271 | 168 | 168 | 164 | 168 |
| B_PR137 | 119 | 129 | 185 | 187 | 185 | 185 | 261 | 265 | 166 | 166 | 164 | 164 |
| B_PR138 | 117 | 123 | 185 | 187 | 185 | 185 | 259 | 265 | 166 | 166 | 164 | 164 |
| B_PR139 | 119 | 123 | 185 | 185 | 185 | 185 | 253 | 271 | 166 | 168 | 164 | 164 |
| B_PR140 | 0   | 0   | 185 | 187 | 177 | 185 | 257 | 271 | 166 | 168 | 162 | 168 |
| B_PR141 | 129 | 131 | 185 | 187 | 181 | 185 | 257 | 261 | 166 | 168 | 164 | 164 |
| B_PR142 | 127 | 135 | 187 | 187 | 185 | 185 | 253 | 273 | 168 | 168 | 164 | 164 |
| B_PR143 | 115 | 129 | 185 | 187 | 177 | 187 | 251 | 255 | 0   | 0   | 164 | 164 |
| B_PR144 | 123 | 129 | 185 | 187 | 177 | 185 | 257 | 259 | 168 | 172 | 162 | 168 |
| B_PR145 | 129 | 129 | 187 | 187 | 177 | 191 | 257 | 257 | 166 | 168 | 164 | 168 |
| B_PR146 | 129 | 129 | 187 | 187 | 169 | 177 | 253 | 265 | 166 | 168 | 164 | 164 |
| B_PR147 | 119 | 123 | 187 | 187 | 185 | 189 | 259 | 265 | 166 | 168 | 164 | 168 |
| B_PR148 | 127 | 129 | 187 | 187 | 179 | 187 | 265 | 267 | 166 | 170 | 164 | 164 |
| B_PR149 | 127 | 129 | 187 | 187 | 177 | 179 | 251 | 265 | 172 | 172 | 162 | 164 |
| B_PR150 | 119 | 133 | 185 | 187 | 179 | 185 | 259 | 261 | 168 | 170 | 162 | 168 |
| B_PR151 | 123 | 127 | 185 | 187 | 177 | 185 | 257 | 265 | 168 | 168 | 164 | 164 |
| B_PR152 | 115 | 129 | 187 | 189 | 187 | 189 | 251 | 267 | 150 | 168 | 152 | 164 |
| B_PR153 | 123 | 125 | 181 | 185 | 169 | 185 | 243 | 253 | 166 | 172 | 152 | 162 |
| B_PR154 | 0   | 0   | 187 | 187 | 179 | 187 | 265 | 265 | 168 | 172 | 164 | 164 |
| B_PR155 | 127 | 129 | 185 | 187 | 179 | 185 | 251 | 265 | 168 | 172 | 162 | 164 |
| B_PR156 | 123 | 127 | 185 | 187 | 183 | 185 | 251 | 253 | 168 | 168 | 164 | 166 |
| B_PR157 | 129 | 131 | 185 | 187 | 179 | 185 | 257 | 265 | 172 | 172 | 164 | 166 |
| B_PR158 | 115 | 127 | 187 | 187 | 179 | 179 | 253 | 265 | 168 | 172 | 164 | 166 |
| B_PR159 | 127 | 129 | 187 | 187 | 177 | 185 | 271 | 271 | 166 | 168 | 168 | 168 |
| B_PR160 | 129 | 131 | 187 | 187 | 177 | 181 | 255 | 257 | 166 | 166 | 166 | 166 |
| B_PR161 | 123 | 129 | 185 | 187 | 177 | 185 | 265 | 271 | 166 | 168 | 164 | 168 |
| B_PR162 | 123 | 125 | 185 | 187 | 185 | 189 | 259 | 261 | 168 | 172 | 162 | 168 |
| B_PR163 | 127 | 127 | 185 | 187 | 177 | 189 | 251 | 265 | 168 | 168 | 164 | 164 |
| B_PR164 | 127 | 129 | 185 | 185 | 185 | 187 | 261 | 265 | 168 | 168 | 164 | 164 |
| B_PR165 | 119 | 129 | 181 | 185 | 185 | 185 | 259 | 271 | 168 | 170 | 164 | 164 |
| B_PR166 | 119 | 125 | 187 | 187 | 179 | 181 | 245 | 253 | 170 | 172 | 162 | 164 |
